# Supplementary figures and images for: The Transcriptome in Transition: Global Gene Expression Profiles of Young Adult Fruit Flies Depend More Strongly on Developmental Than Adult Diet
Source: Frontiers journal article supplement (doi:10.3389/fevo.2021.624306), 2021-03-08

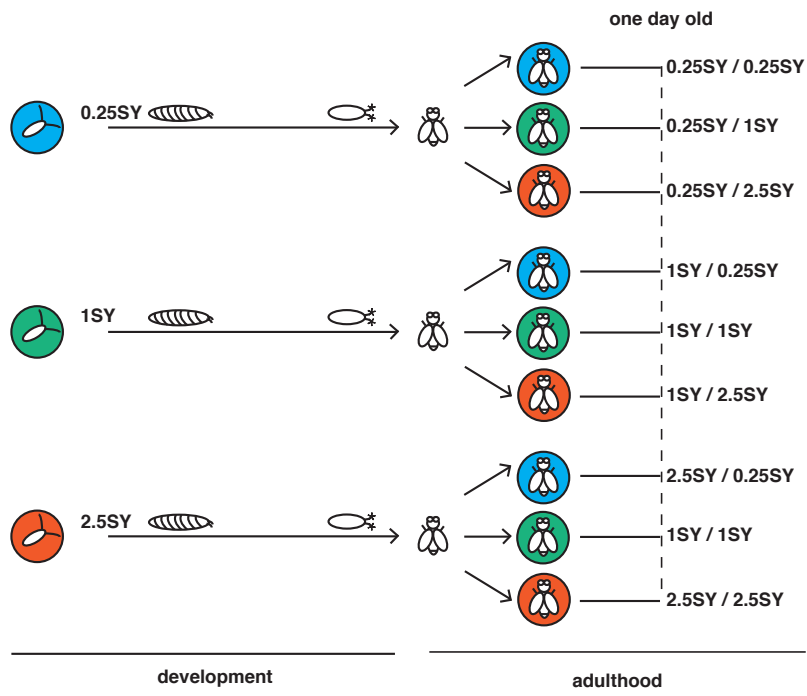

Supplement: Data_Sheet_2.PDF [file Data_Sheet_2.PDF]
